# Supplementary material for: U-to-C RNA editing by synthetic PPR-DYW proteins in bacteria and human culture cells
Source: PubMed Central journal article supplement (PMC9478123; doi:10.1038/s42003-022-03927-3), 2022-09-15
Supplement: 42003_2022_3927_MOESM2_ESM.pdf [file 42003_2022_3927_MOESM2_ESM.pdf]

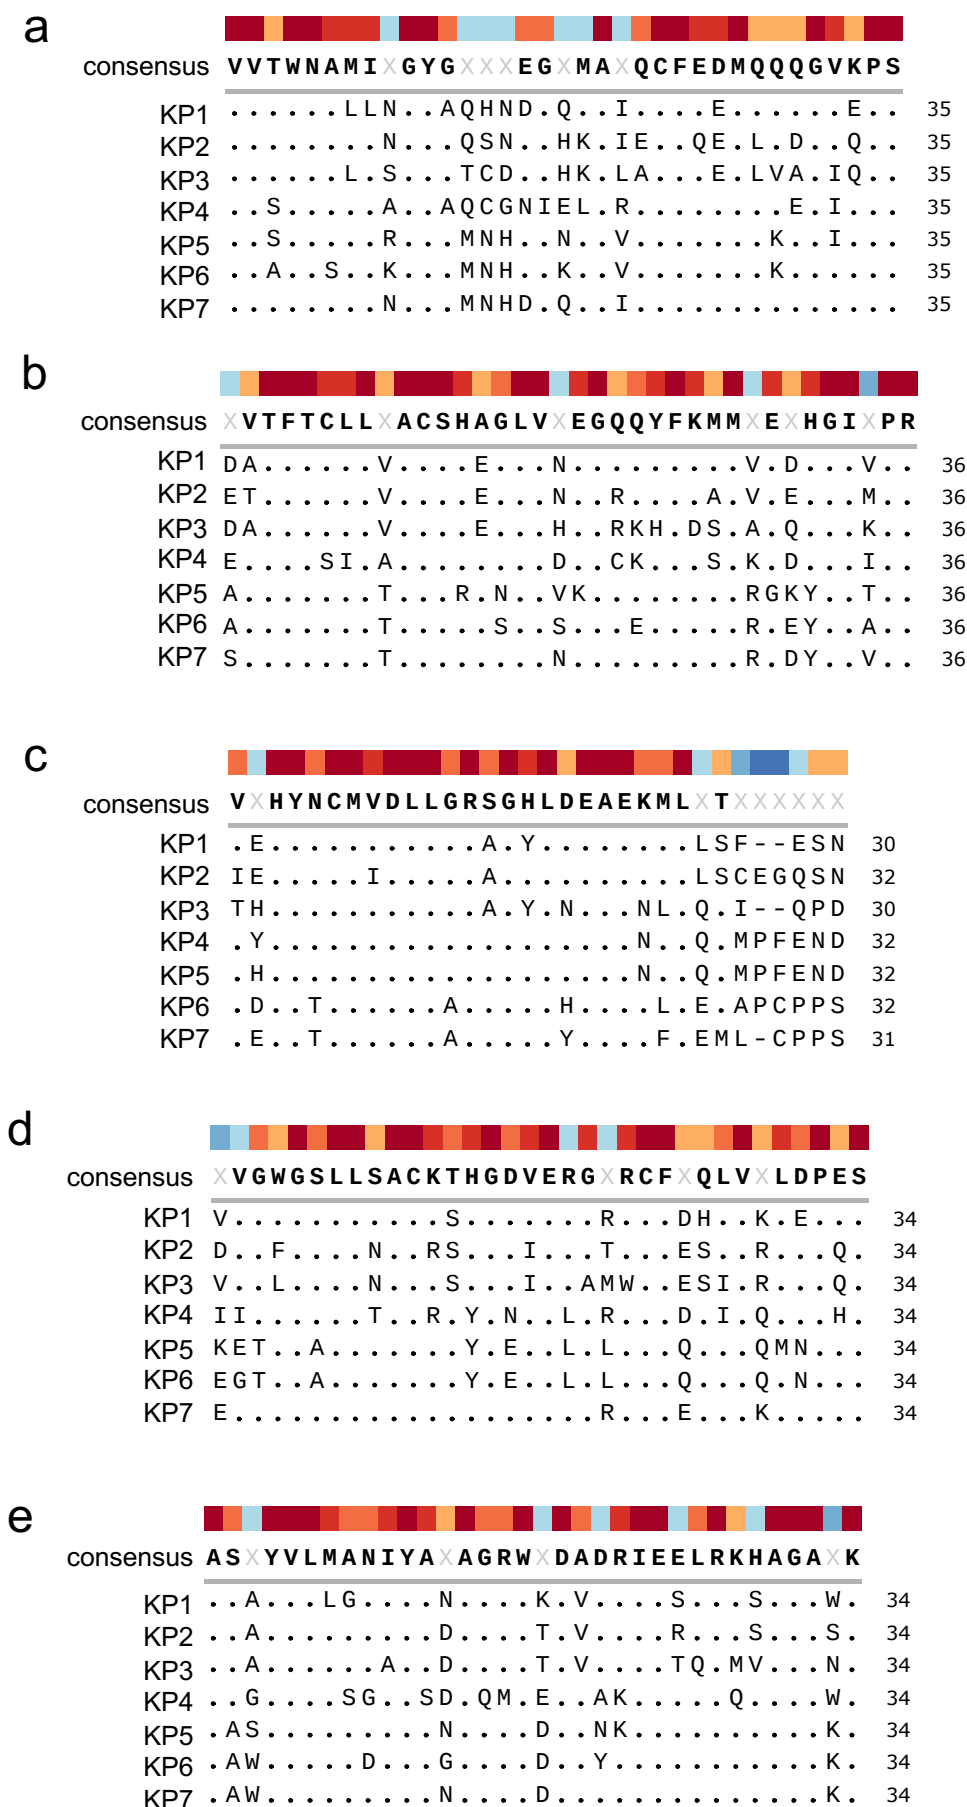

**Supplementary Figure 2. Amino acid sequence comparison of seven designer KP proteins.** The amino acid sequences of P2 (a), L2 (b), S2 (c), E1 (d) and E2 (e) motifs are aligned and compared to a consensus sequence shown on the top. The amino acids matching the consensus sequence are marked with a dot. Higher conservation is indicated by warm colors (such as brown and red) and lower conservation by cool colors (such as blue).

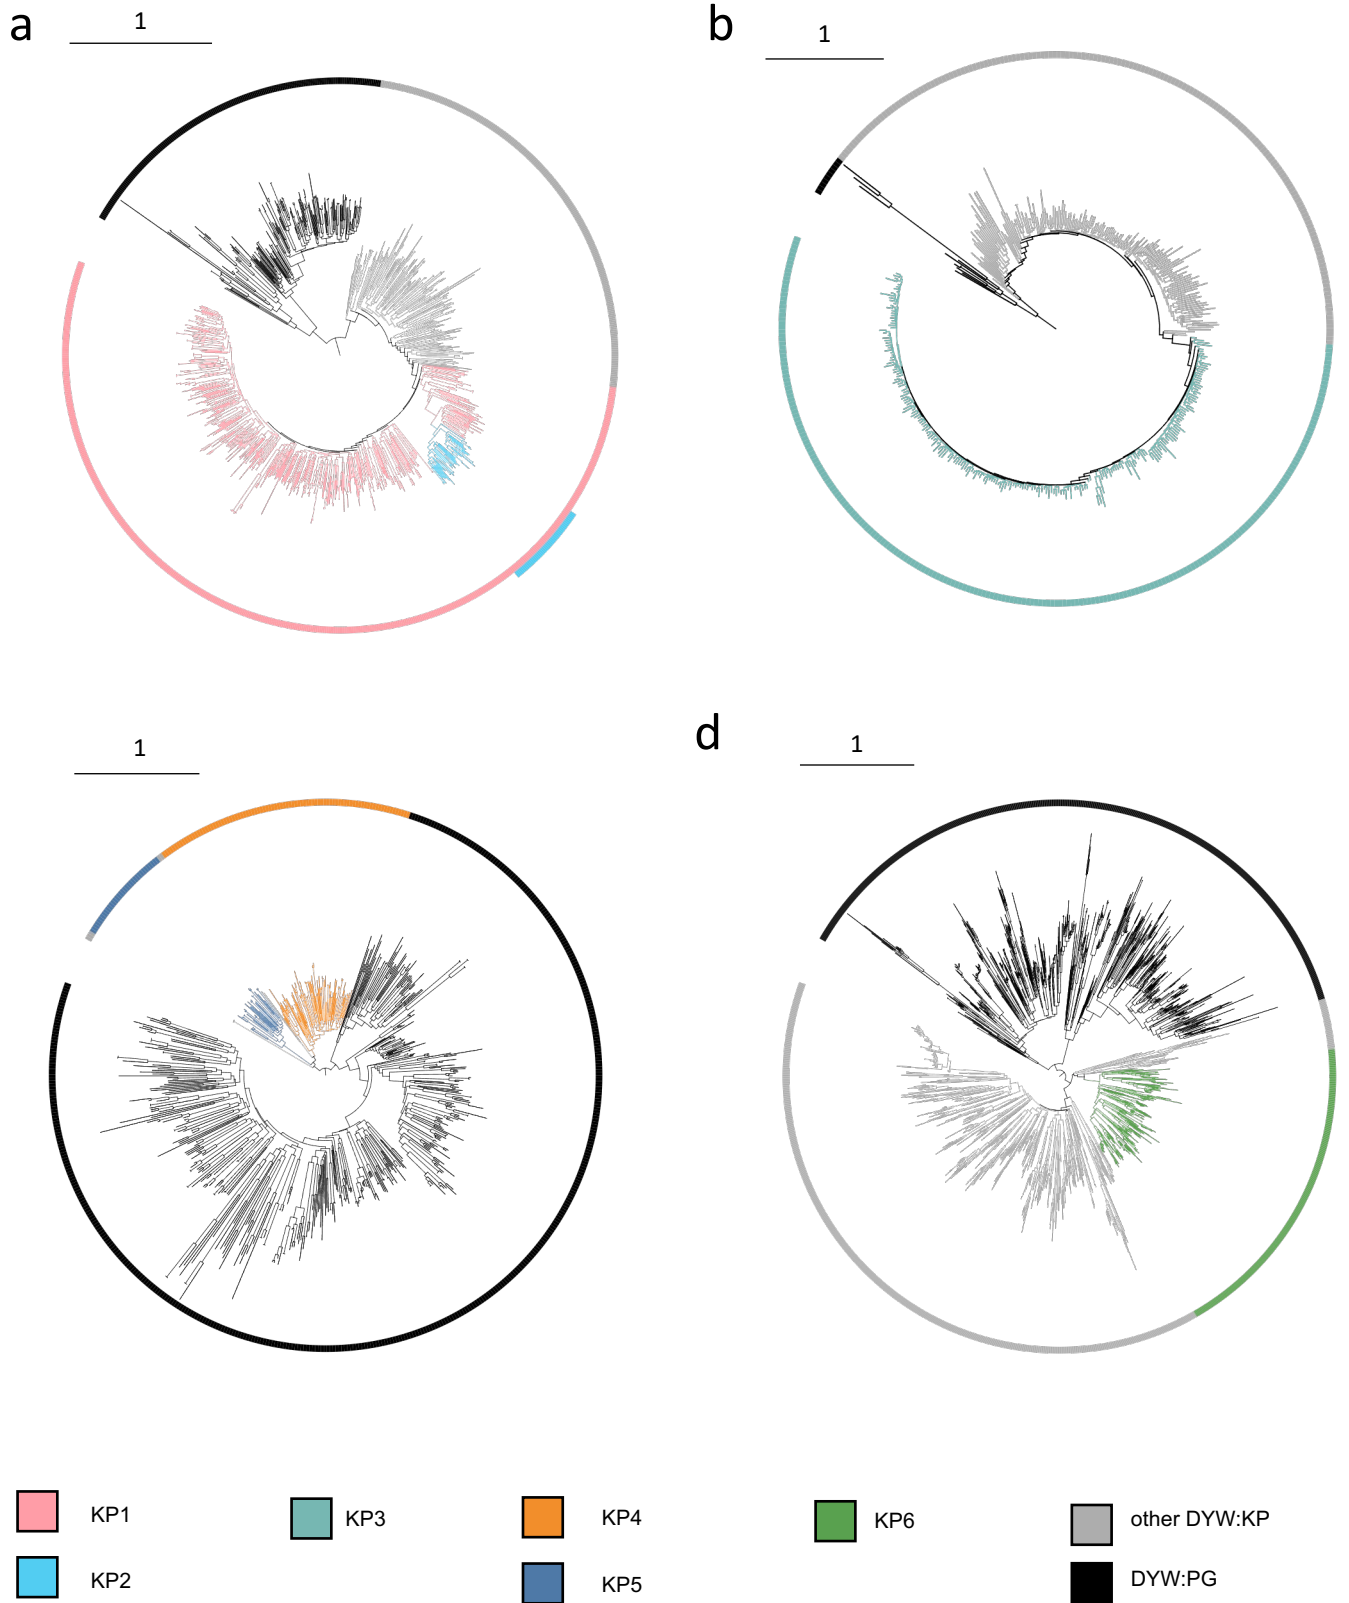

**Supplementary Figure 3. DYW:KP subclades used in the design of the U-to-C editing factors.** Approximately maximum-likelihood phylogenetic trees on DYW C-terminal domains isolated in hornwort (a), lycophyte (c) and fern (d) transcriptomes and *Anthoceros angustus* genome (b), rooted using DYW:PG as an outgroup. Colour code indicates the subgroups of DYW:KP proteins isolated to design the DYW:KP proteins. Visualisation was with iTOL (Letunic and Bork 2016).

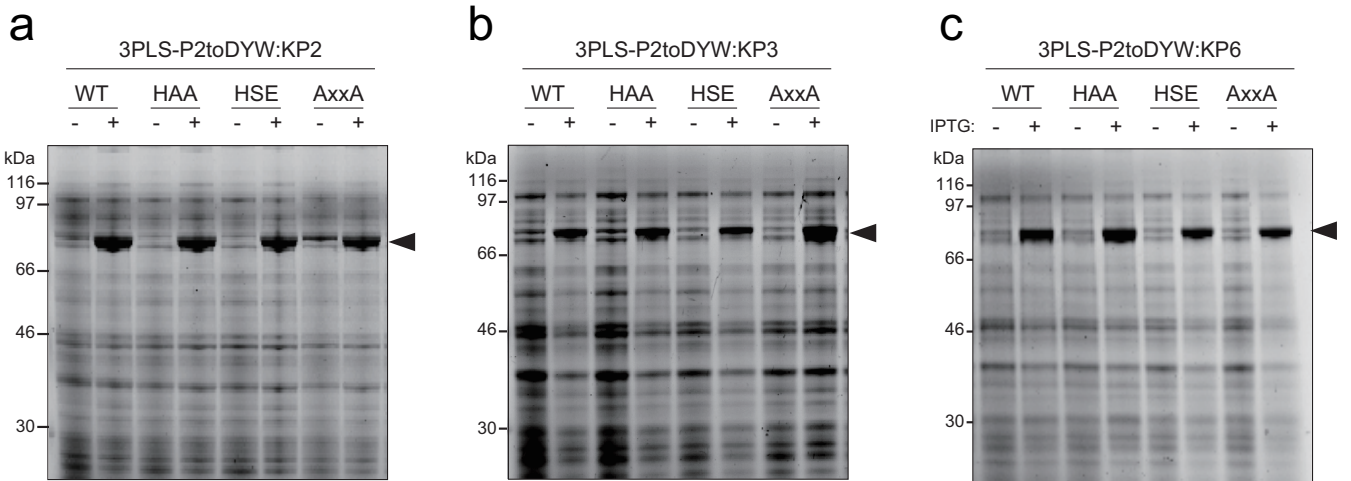

**Supplementary Figure 4. The expression of DYW:KP catalytic mutant proteins.** KP2 (a), KP3 (b) and KP6 (c) protein expression was verified by SDS-PAGE after loading bacterial lysates before (-) and after (+) 18 h IPTG induction.

**a**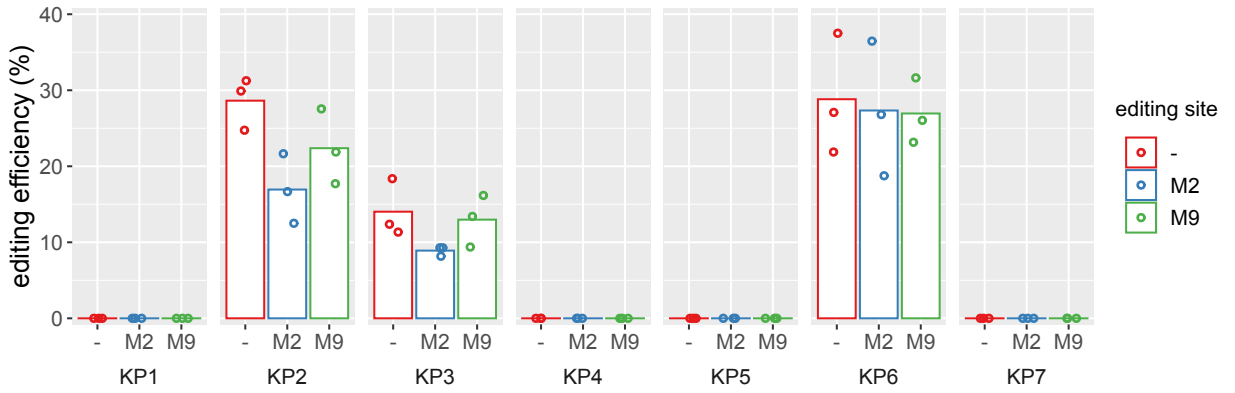**b**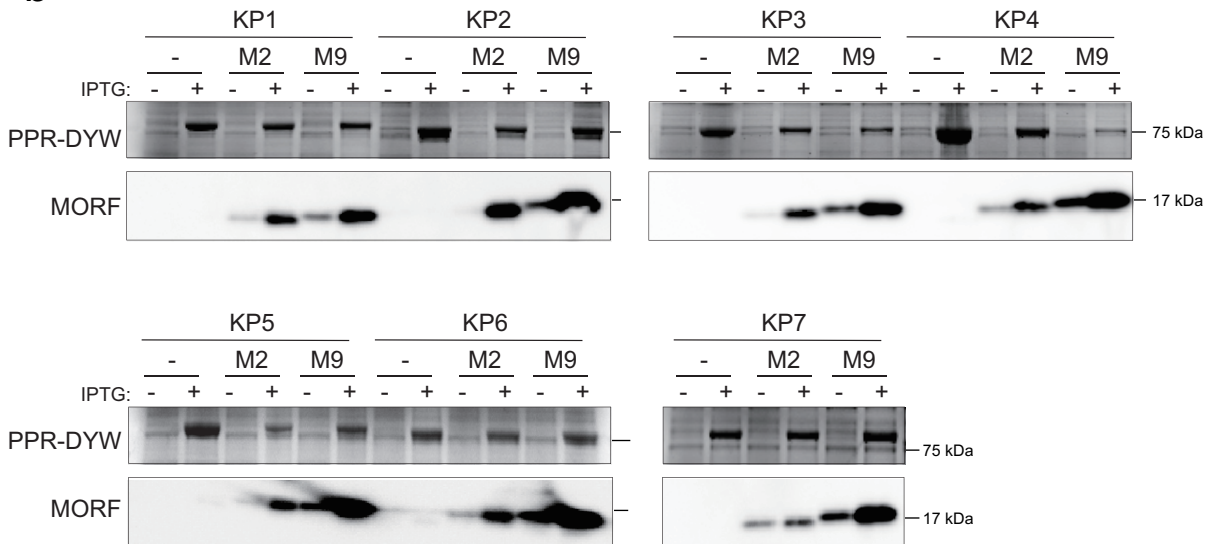

**Supplementary Figure 5. U-to-C editing activity with MORF proteins.** (a) Editing efficiency of DYW:KP proteins in the absence (-) or presence of MORF2 (M2) or MORF9 (M9). The bar height corresponds to the mean of editing efficiency between three biologically independent replicates (dots). (b) The expression of the DYW:KP (upper panel) and MORF proteins (lower panel) were verified by SDS-PAGE or western blotting (1:10,000 Anti-His-tag mAb-HRP-DirectT, MBL D291-7) after loading bacterial lysates before (-) and after (+) 18 h IPTG induction.

|                    |                  | PPR code                    |   |   |   |   |   |   |   |   |   |   |   |   |   | Length | Editing efficiency |    |   |   |   |   |   |   |   |   |    |     |    |     |   |   |    |
|--------------------|------------------|-----------------------------|---|---|---|---|---|---|---|---|---|---|---|---|---|--------|--------------------|----|---|---|---|---|---|---|---|---|----|-----|----|-----|---|---|----|
|                    |                  | 5                           | N | P | S | N | C | N | T | P | S | N | T | G | G | V      | DYW                |    |   |   |   |   |   |   |   |   |    |     |    |     |   |   |    |
|                    |                  | last                        | D | D | N | S | I | T | D | D | S | R | N | S | K |        |                    |    |   |   |   |   |   |   |   |   |    |     |    |     |   |   |    |
|                    |                  | Target ( <i>AtrpoA</i> )    | t | t | a | c | a | c | g | t | g | c | a | a | a | a      | t                  |    |   |   |   |   |   |   |   |   |    |     |    |     |   |   |    |
| C-to-U off-targets | U-to-C consensus | NNNNNNNACANGGGCAAANN        | T | N | N | N | N | N | N | N | N | N | N | N | N | N      | N                  | 26 |   |   |   |   |   |   |   |   |    |     |    |     |   |   |    |
|                    | chr5:168494664   | TAAAAAGGT.TAT.T.C.CTCTTCTA  | T | A | A | A | A | A | G | G | T | . | T | A | T | .      | T                  | .  | C | . | C | T | C | T | T | C | T  | A   | 26 | 46% |   |   |    |
|                    | chr3:48626003    | CCTCCCCT.CTCT..CTGCTCAGGTC  | C | C | T | C | C | C | C | T | . | C | T | C | T | .      | .                  | C  | T | G | C | T | C | A | G | G | T  | C   | 26 | 43% |   |   |    |
|                    | chr7:64927843    | ACTTAACCA.T.TTTG.CAACTACCC  | A | C | T | T | A | A | C | C | A | . | T | . | T | T      | T                  | G  | . | C | A | A | C | T | A | C | C  | C   | 26 | 22% |   |   |    |
|                    | chr7:28821161    | TGTGTGTGTGT.T.TGTGTTCATGGG  | T | G | T | G | T | G | T | G | T | . | T | . | T | G      | T                  | G  | T | T | C | A | T | G | G | G | 26 | 19% |    |     |   |   |    |
|                    | chr4:38694874    | CAAAGTGTA CACTAA..GCTCCCACT | C | A | A | A | G | T | G | T | A | C | A | C | T | A      | A                  | .  | . | G | C | T | C | C | C | A | C  | T   | 26 | 8%  |   |   |    |
|                    | chr5:134206047   | GAGATGTG..T.....TTTCATGAT   | G | A | G | A | T | G | T | G | . | . | T | . | . | .      | .                  | .  | . | . | . | . | . | T | T | T | C  | A   | T  | G   | A | T | 26 |

↑  
Editing site

**Supplementary Figure 6. Nucleotide sequence comparison of six C-to-U off-target editing sites with the U-to-C off-target site consensus sequence.** The consensus was derived from EMBOSS:cons. The nucleotides matching the consensus sequence are marked with a dot.

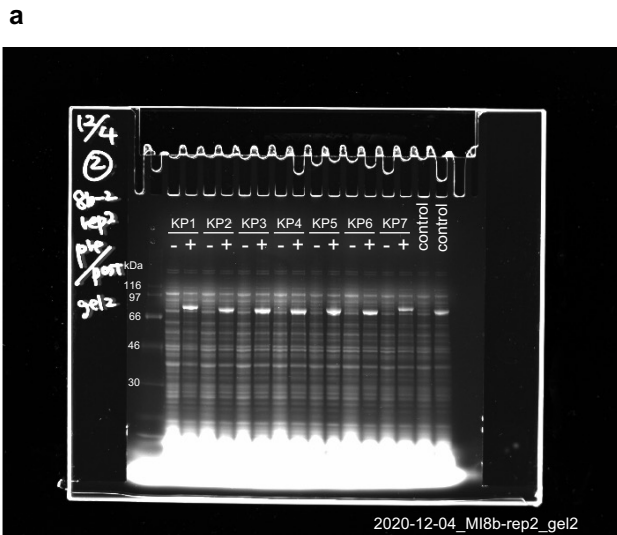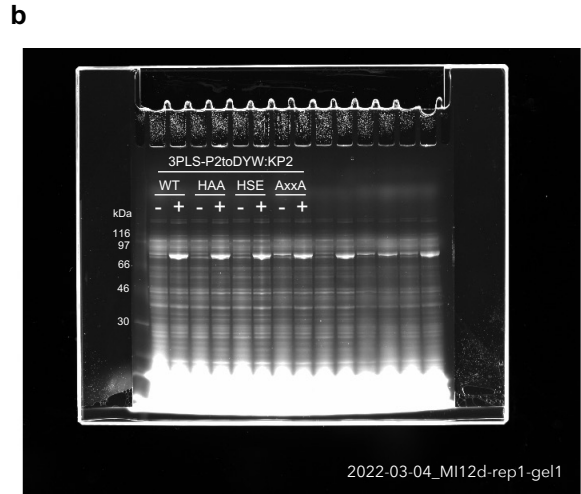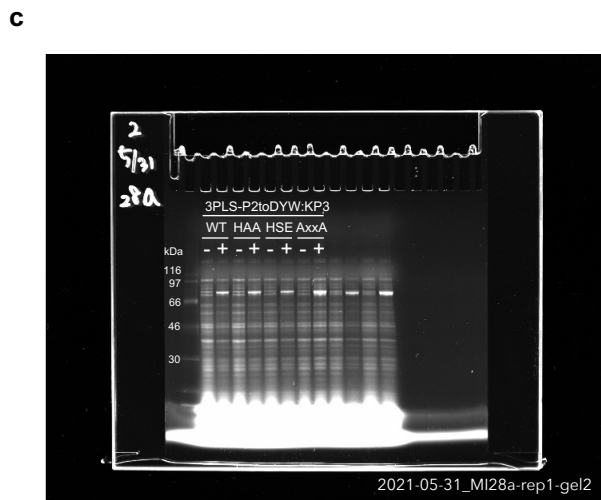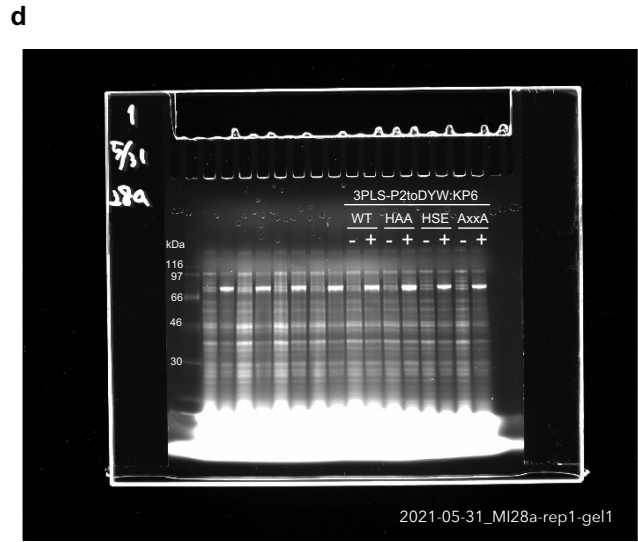

**Supplementary Figure 7. Uncropped and unedited images used in Figure 3 and Supplementary Figure 4**  
 SDS-PAGE gels shown in Figure 3b (a), Figure S4a (b), Figure S4b (c) and Figure S4c (d).

a

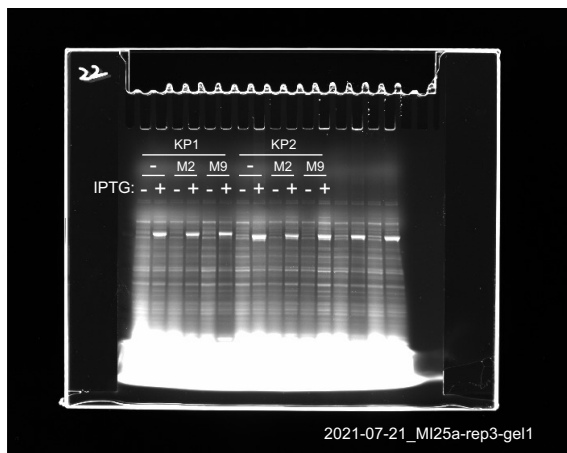

b

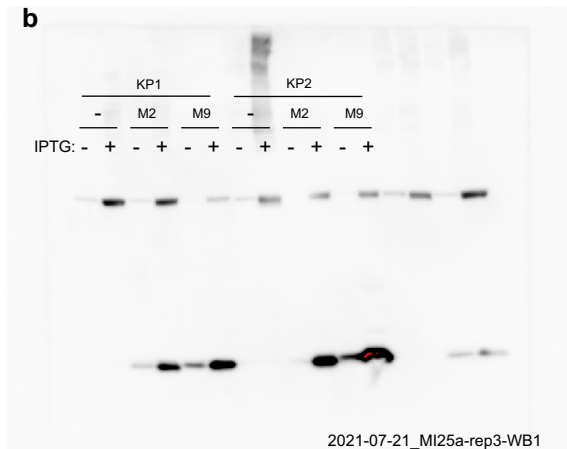

c

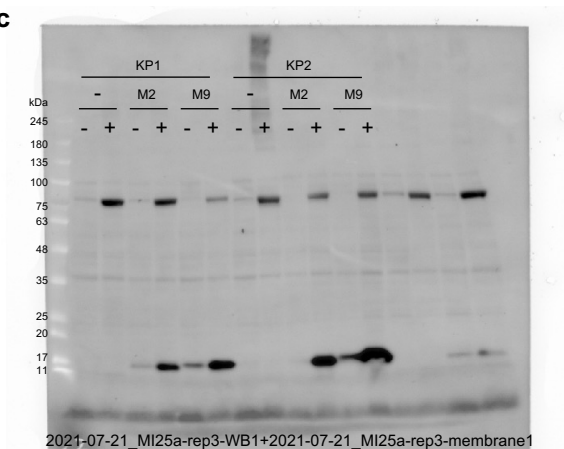

Supplementary Figure 8. Uncropped and unedited images corresponding to the SDS-PAGE gel and western blot images shown in Supplementary Figure 5 for KP1 and 2.

(a) SDS-PAGE gel, (b) blot with His-tag and (c) merged with size marker showing the expression of KP1, 2 and MORF proteins.



a

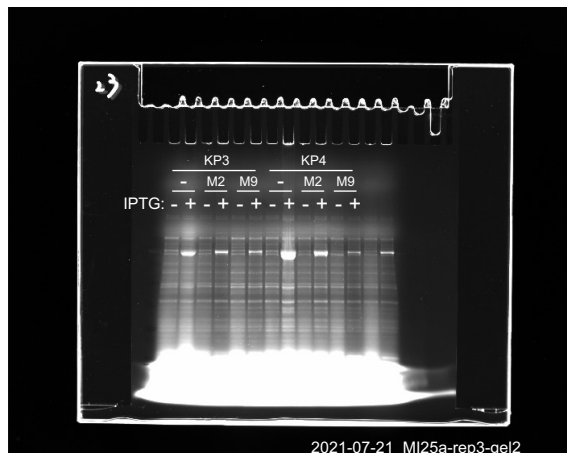

b

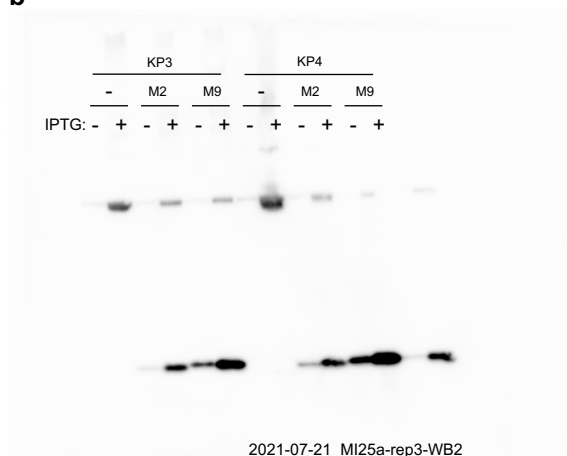

c

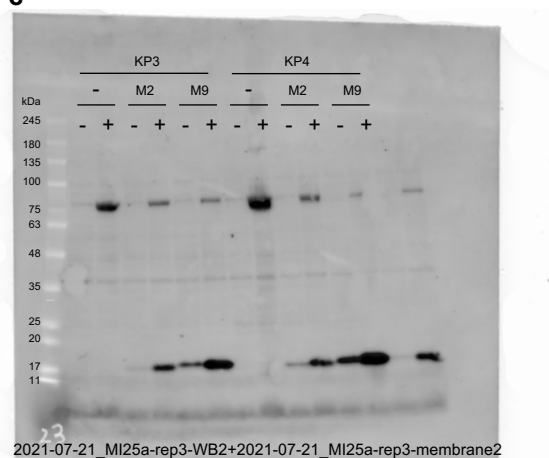

**Supplementary Figure 9. Uncropped and unedited images corresponding to the SDS-PAGE gel and western blot images shown in Supplementary Figure 5 for KP3 and 4.**

(a) SDS-PAGE gel, (b) blot with His-tag and (c) merged with size marker showing the expression of KP3, 4 and MORF proteins.

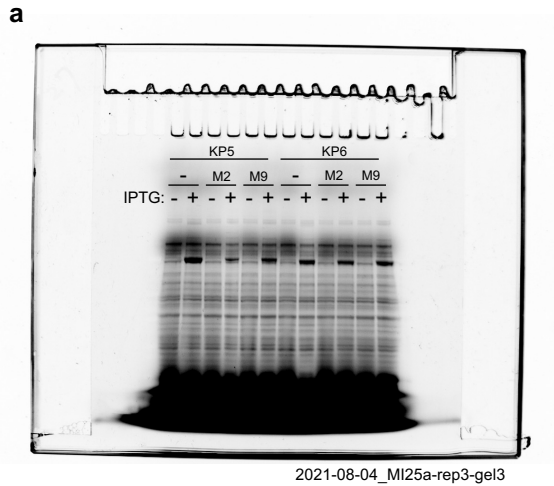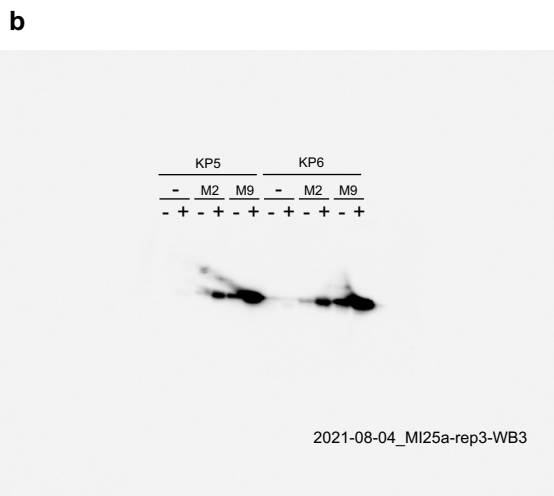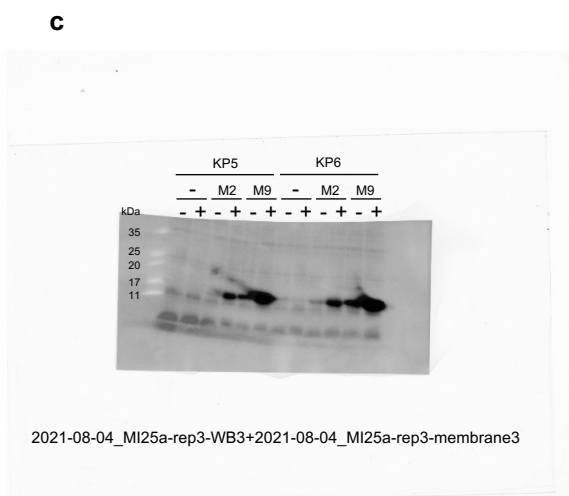

**Supplementary Figure 10. Uncropped and unedited images corresponding to the SDS-PAGE gel and western blot images shown in Supplementary Figure 5 for KP5 and 6.**  
 (a) SDS-PAGE gel, (b) blot with His-tag and (c) merged with size marker showing the expression of KP5, 6 and MORF proteins.

a

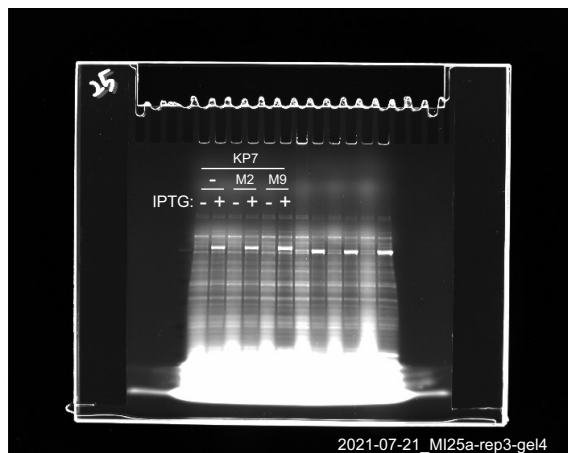

b

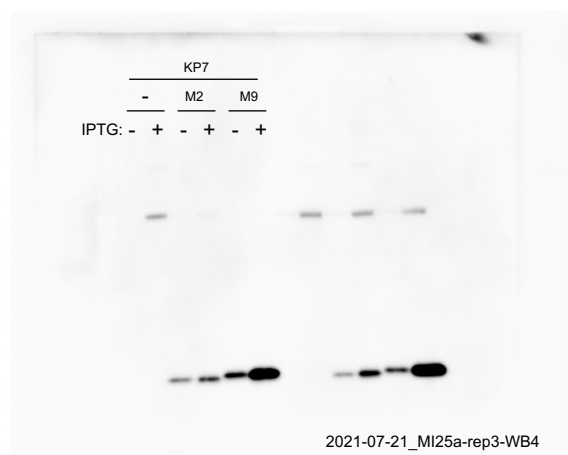

c

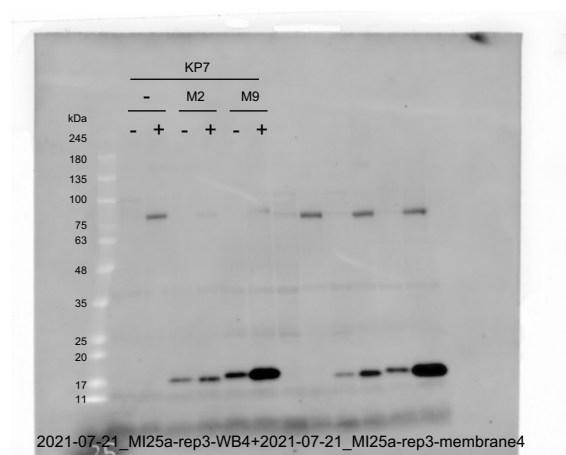

**Supplementary Figure 11. Uncropped and unedited images corresponding to the SDS-PAGE gel and western blot images shown in Supplementary Figure 5 for KP7.**

(a) SDS-PAGE gel, (b) blot with His-tag and (c) merged with size marker showing the expression of KP7 and MORF proteins.

**Supplementary Table 1.** The number of sequences used to design the PLS domain

|        | P1     | L1     | S1     |
|--------|--------|--------|--------|
| First  | 3,363  | 3,741  | 3,845  |
| Middle | 18,643 | 22,364 | 28,337 |
| Last   | 12,882 | 13,871 | 15,593 |

**Supplementary Table 2.** The number of sequences used to design the KP domains

|     | P2  | L2  | S2  | E1  | E2  | DYW |
|-----|-----|-----|-----|-----|-----|-----|
| KP1 | 314 | 315 | 342 | 432 | 476 | 301 |
| KP2 | 20  | 20  | 22  | 36  | 40  | 37  |
| KP3 | 209 | 219 | 221 | 225 | 229 | 216 |
| KP4 | 44  | 57  | 48  | 67  | 73  | 66  |
| KP5 | 22  | 19  | 24  | 24  | 28  | 26  |
| KP6 | 221 | 243 | 219 | 276 | 301 | 287 |
| KP7 | 411 | 432 | 282 | 540 | 580 | 658 |

**Supplementary Table 3.** Oligonucleotides used in this study

| Name             | Sequence (5' -> 3')                            | Purpose                                                                      |
|------------------|------------------------------------------------|------------------------------------------------------------------------------|
| Trx-Esp3I-F      | GCATCGTCTCATGGCCGGAGGGAGCGATAAAATTATTCACCTGACT | clone Trx-6His-TEV in modified pET21b vector and mammalian expression vector |
| TEV-Esp3I-R      | TCGTCTCTACTAGAAGACATGTGACAACAGAATTACCCATGGCGC  | clone Trx-6His-TEV in modified pET21b vector                                 |
| Esp3I-Bpil-KP1-F | TCGTCTCATAGTGAAGACATGACGTTGTAACTGGAATGCCTT     | clone KP1 in modified pET21b vector                                          |
| Esp3I-Bpil-KP2-F | TCGTCTCATAGTGAAGACATGACGTGGTGACTTGAACGCTAT     | clone KP2 in modified pET21b vector                                          |
| Esp3I-Bpil-KP3-F | TCGTCTCATAGTGAAGACATGACGTCGTTACTTGAACGCCCT     | clone KP3 in modified pET21b vector                                          |
| Esp3I-Bpil-KP4-F | TCGTCTCATAGTGAAGACATGACGTTGTCTCTTGAATGCAAT     | clone KP4 in modified pET21b vector                                          |
| Esp3I-Bpil-KP5-F | TCGTCTCATAGTGAAGACATGACGTCGTGCTGAGCTGGAATGCGAT | clone KP5 in modified pET21b vector                                          |
| Esp3I-Bpil-KP6-F | TCGTCTCATAGTGAAGACATGACGTTGTGGCTTGAACCTCAATGAT | clone KP6 in modified pET21b vector                                          |
| Esp3I-Bpil-KP7-F | TCGTCTCATAGTGAAGACATGACGTTGTTACGTGGAACGCGAT    | clone KP7 in modified pET21b vector                                          |
| Esp3I-KP1-R      | TCGTCTCTGTTAGTGTGGTCCCCACAACCTAC               | clone KP1 in modified pET21b vector                                          |
| Esp3I-KP2-R      | TCGTCTCTGTTATGGTCTCTCCGCAACTGC                 | clone KP2 in modified pET21b vector                                          |
| Esp3I-KP3-R      | TCGTCTCTGTTATGGCCGTCCTTGCATGAGC                | clone KP3 in modified pET21b vector                                          |
| Esp3I-KP4-R      | TCGTCTCTGTTAGTAGTAGTCTCCGCAACTGC               | clone KP4 in modified pET21b vector                                          |
| Esp3I-KP5-R      | TCGTCTCTGTTACCACATATCGCCGCATGAGC               | clone KP5 in modified pET21b vector                                          |
| Esp3I-KP6-R      | TCGTCTCTGTTAGAACATGTCTCCGAGGAGC                | clone KP6 in modified pET21b vector                                          |
| Esp3I-KP7-R      | TCGTCTCTGTTAGTAGCGATCTCCGCAACTGC               | clone KP7 in modified pET21b vector                                          |
| Bpil-PLS-F       | TGAAGACATTCACATGGAATTCATGATTAGGGGC             | clone PLS in modified pET21b vector                                          |
| Bpil-PLS-R       | TGAAGACATCGTCTTTCTCGGGCATTTCATC                | clone PLS in modified pET21b vector                                          |
| rpoA-C-Esp3I-R   | GCATCGTCTCTTAGCTCTCAGATTTTGACAGTGTAAAT         | clone Trx-6His-TEV-3PLS-DYW-rpoA in mammalian expression vector              |
| rpoA-U-Esp3I-R   | GCATCGTCTCTTAGCTCTCAAATTTTGACAGTGTAAAT         | clone Trx-6His-TEV-3PLS-DYW-rpoA in mammalian expression vector              |
| KP3-HAA-mutF     | CATGCAGCGAAGCTGGCACTGGCATTCC                   | mutate active site in KP3                                                    |
| KP3-HAA-mutR     | CAGCTTCGCTGCATGTCCACAGAGCG                     | mutate active site in KP3                                                    |
| KP3-HSE-mutF     | TGGACATTACAGAGAAGCTGGCACTGG                    | mutate active site in KP3                                                    |
| KP3-HSE-mutR     | TTCTCTGAATGTCCACAGAGCGCGTC                     | mutate active site in KP3                                                    |
| KP3-AxxA-mutF    | TGGCCTCCGACGCCCACTCTCAACAGAGATTA               | mutate active site in KP3                                                    |
| KP3-AxxA-mutR    | GGGCGTCGGAGGCCATTCTCAAGTCTTGGA                 | mutate active site in KP3                                                    |
| KP6-HAA-F        | CACGCAGCGAAGTTGGCAATTGCATT                     | modify the nucleotide in <i>Atrp</i> <i>o</i> A                              |
| KP6-HAA-R        | CAACTTCGCTGCGTGCTCACACAGCG                     | modify the nucleotide in <i>Atrp</i> <i>o</i> A                              |
| KP6-HSE-mutF     | TGAGCACTACAGAGAAGTTGGCAATTG                    | modify the nucleotide in <i>Atrp</i> <i>o</i> A                              |
| KP6-HSE-mutR     | TTCTCTGAGTGCTCACACAGCGCTGC                     | modify the nucleotide in <i>Atrp</i> <i>o</i> A                              |
| KP6-AxxA-mutF    | TGGCCAATGACGCCCAATTCGCTCAAAGAT                 | modify the nucleotide in <i>Atrp</i> <i>o</i> A                              |
| KP6-AxxA-mutR    | GGGCGTCATTGGCCATTCTCAGGTTCTTTGT                | modify the nucleotide in <i>Atrp</i> <i>o</i> A                              |
| rpoA-5C-mutF     | CATGTATTACACGTGCCAAATTTGAGAGCTAGCAG            | modify the nucleotide in <i>Atrp</i> <i>o</i> A                              |
| rpoA-5G-mutF     | CATGTATTACACGTGCCAAATTTGAGAGCTAGCAG            | modify the nucleotide in <i>Atrp</i> <i>o</i> A                              |
| rpoA-5T-mutF     | CATGTATTACACGTGCTAAATTTGAGAGCTAGCAG            | modify the nucleotide in <i>Atrp</i> <i>o</i> A                              |
| rpoA-4C-mutF     | CATGTATTACACGTGCACAATTTGAGAGCTAGCAGC           | modify the nucleotide in <i>Atrp</i> <i>o</i> A                              |
| rpoA-4G-mutF     | CATGTATTACACGTGCAGAATTTGAGAGCTAGCAGC           | modify the nucleotide in <i>Atrp</i> <i>o</i> A                              |
| rpoA-4T-mutF     | CATGTATTACACGTGCATAATTTGAGAGCTAGCAGC           | modify the nucleotide in <i>Atrp</i> <i>o</i> A                              |
| rpoA-3C-mutF     | CATGTATTACACGTGCAACATTTGAGAGCTAGCAGCG          | modify the nucleotide in <i>Atrp</i> <i>o</i> A                              |
| rpoA-3G-mutF     | CATGTATTACACGTGCAAGATTTGAGAGCTAGCAGCG          | modify the nucleotide in <i>Atrp</i> <i>o</i> A                              |
| rpoA-3T-mutF     | CATGTATTACACGTGCAATTTGAGAGCTAGCAGCG            | modify the nucleotide in <i>Atrp</i> <i>o</i> A                              |
| rpoA-2C-mutF     | CATGTATTACACGTGCAAACTTTGAGAGCTAGCAGCGA         | modify the nucleotide in <i>Atrp</i> <i>o</i> A                              |
| rpoA-2G-mutF     | CATGTATTACACGTGCAAGTTTGGAGAGCTAGCAGCGA         | modify the nucleotide in <i>Atrp</i> <i>o</i> A                              |
| rpoA-2T-mutF     | CATGTATTACACGTGCAATTTTGGAGAGCTAGCAGCGA         | modify the nucleotide in <i>Atrp</i> <i>o</i> A                              |

| Name         | Sequence (5' -> 3')                      | Purpose                                               |
|--------------|------------------------------------------|-------------------------------------------------------|
| rpoA-1A-mutF | CATGTATTACACGTGCAAAAATTGAGAGCTAGCAGCGAG  | modify the nucleotide in <i>AtrpoA</i>                |
| rpoA-1C-mutF | CATGTATTACACGTGCAAAACTTGAGAGCTAGCAGCGAG  | modify the nucleotide in <i>AtrpoA</i>                |
| rpoA-1G-mutF | CATGTATTACACGTGCAAAAGTTGAGAGCTAGCAGCGAG  | modify the nucleotide in <i>AtrpoA</i>                |
| rpoA+1A-mutF | CATGTATTACACGTGCAAAATTAGAGAGCTAGCAGCGAGC | modify the nucleotide in <i>AtrpoA</i>                |
| rpoA+1C-mutF | CATGTATTACACGTGCAAAATTCGAGAGCTAGCAGCGAGC | modify the nucleotide in <i>AtrpoA</i>                |
| rpoA+1G-mutF | CATGTATTACACGTGCAAAATTTGAGAGCTAGCAGCGAGC | modify the nucleotide in <i>AtrpoA</i>                |
| rpoA+2A-mutF | CATGTATTACACGTGCAAAATTTAAGAGCTAGCAGCGAGC | modify the nucleotide in <i>AtrpoA</i>                |
| rpoA+2C-mutF | CATGTATTACACGTGCAAAATTTAGAGCTAGCAGCGAGC  | modify the nucleotide in <i>AtrpoA</i>                |
| rpoA+2T-mutF | CATGTATTACACGTGCAAAATTTTAGAGCTAGCAGCGAGC | modify the nucleotide in <i>AtrpoA</i>                |
| rpoA-BS-Rv   | CACGTGTAATACATGTTCTTCTATTCT              | modify the nucleotide in <i>AtrpoA</i>                |
| rpoA-mut-R   | TTTGCACGTGTAATACATGTTCTTCTATT            | modify the nucleotide in <i>AtrpoA</i>                |
| rpoA-CuCC-F  | TATTACACGTGCAAACTCCAGAGCTAGCAGCGAG       | modify the nucleotide in <i>AtrpoA</i>                |
| rpoA-CuCA-F  | TATTACACGTGCAAACTCAAGAGCTAGCAGCGAG       | modify the nucleotide in <i>AtrpoA</i>                |
| rpoA-CuAC-F  | TATTACACGTGCAAACTACAGAGCTAGCAGCGAG       | modify the nucleotide in <i>AtrpoA</i>                |
| rpoA-CuAA-F  | TATTACACGTGCAAACTAAAGAGCTAGCAGCGAG       | modify the nucleotide in <i>AtrpoA</i>                |
| rpoA-CcCC-F  | TATTACACGTGCAAAACCCAGAGCTAGCAGCGAG       | modify the nucleotide in <i>AtrpoA</i>                |
| rpoA-CcCA-F  | TATTACACGTGCAAAACCCAAGAGCTAGCAGCGAG      | modify the nucleotide in <i>AtrpoA</i>                |
| rpoA-CcAC-F  | TATTACACGTGCAAAACCACAGAGCTAGCAGCGAG      | modify the nucleotide in <i>AtrpoA</i>                |
| rpoA-CcAA-F  | TATTACACGTGCAAAACCAAAGAGCTAGCAGCGAG      | modify the nucleotide in <i>AtrpoA</i>                |
| KP1-seqF     | CCACTCTGCTCGTGACAAAA                     | gene amplification and sequencing in editing analysis |
| KP2-seqF     | GTCACCAAGAATCTGCGGAT                     | gene amplification and sequencing in editing analysis |
| KP3-seqF     | GACTGCTGAACACACCCAGT                     | gene amplification and sequencing in editing analysis |
| KP4-seqF     | ATCGCGTTTGGACTGATTC                      | gene amplification and sequencing in editing analysis |
| KP5-seqF     | CAGACCCTTCGAGTGACCAA                     | gene amplification and sequencing in editing analysis |
| KP6-seqF1    | GGGCGGTGGGACGACGCATACCGGAT               | gene amplification in editing analysis                |
| KP6-seqF2    | AATACGCCACAGGGACAGAC                     | sequencing in editing analysis                        |
| KP7-seqF     | GACTCCTTAACACTCCTCAA                     | gene amplification and sequencing in editing analysis |
| T7short.REV  | TATGCTAGTTATTGCTCAG                      | gene amplification and sequencing in editing analysis |
| PM18033-seqR | CACTGCATTCTAGTTGTGGTTTG                  | gene amplification and sequencing in editing analysis |
