# Supplementary material for: U-to-C RNA editing by synthetic PPR-DYW proteins in bacteria and human culture cells
Source: PubMed Central journal article supplement (PMC9478123; doi:10.1038/s42003-022-03927-3), 2022-09-15
Supplement: 42003_2022_3927_MOESM3_ESM.pdf [file 42003_2022_3927_MOESM3_ESM.pdf]

## Description of Additional Supplementary Files

**File name:** Supplementary Data 1

**Description:** Summary of RNA-seq analysis.

**File name:** Supplementary Data 2

**Description:** Potential off-target editing sites having one to three mismatches with AtrpoA editing site.

**File name:** Supplementary Data 3

**Description:** RNA editing analysis of DYW:KP protein variants in bacterial and human cells.

**File name:** Supplementary Data 4

**Description:** The source data behind the graphs depicting the editing efficiency of the KP proteins on AtrpoA in the paper.
